# Supplementary material
Source: PubMed Central journal article supplement (PMC6294324)
Supplement: NIHMS1511349-supplement-2.pdf [file NIHMS1511349-supplement-2.pdf]

| Target Domain                                                                                                       | sgRNA ID  | Sequence                         |
|---------------------------------------------------------------------------------------------------------------------|-----------|----------------------------------|
| <b>LSD1-NT</b>                                                                                                      | sgNterm-1 | CGCGGAGGCTCTTTCTTGCG <b>GGG</b>  |
|                                                                                                                     | sgNterm-2 | CCGGCCCTACTGTCGTGCCT <b>GGG</b>  |
|                                                                                                                     | sgNterm-3 | GTCGGACCAGCCGGCGCAAG <b>CGG</b>  |
|                                                                                                                     | sgNterm-4 | CCGCAAGAAAGAGCCTCCGC <b>GGG</b>  |
| <b>LSD1-SWIRM</b>                                                                                                   | sgSWIRM-1 | GGACTTCAAGACGACAGTTCT <b>TGG</b> |
|                                                                                                                     | sgSWIRM-2 | TGAGAAGTCATCCGGTCATG <b>AGG</b>  |
|                                                                                                                     | sgSWIRM-3 | CTAAATAACTGTGAACTCGG <b>TGG</b>  |
|                                                                                                                     | sgSWIRM-4 | CACAGTTATTTAGAGCGTCAT <b>TGG</b> |
|                                                                                                                     | sgSWIRM-5 | CGTCATGGTCTTATCAACTT <b>CGG</b>  |
| <b>LSD1-AOD1</b>                                                                                                    | sgAOD-1   | AAGGTAATTATTATAGGCTCT <b>TGG</b> |
|                                                                                                                     | sgAOD-2   | GCTCGACAGTTACAAAGTTTT <b>TGG</b> |
|                                                                                                                     | sgAOD-3   | CGAGTTGCCACATTTTCGCAA <b>AGG</b> |
|                                                                                                                     | sgAOD-4   | GTCCGTTGGCTTCATAAAGT <b>GGG</b>  |
| <b>LSD1-TOWER</b>                                                                                                   | sgTower-1 | GAACTCGGCAGTAATATCTCT <b>TGG</b> |
|                                                                                                                     | sgTower-2 | AACTCGGCAGTAATATCTCT <b>GGG</b>  |
|                                                                                                                     | sgTower-3 | GGATCTGACCGCCCTATGCA <b>AGG</b>  |
|                                                                                                                     | sgTower-4 | ATACCACACCTTGCATAGGG <b>CGG</b>  |
| <b>LSD1-AOD2</b>                                                                                                    | sgAOD-5   | TAAAGGTTTGACTCGTGGAG <b>CGG</b>  |
|                                                                                                                     | sgAOD-6   | GGTGGCACAAACTGAACGGCT <b>TGG</b> |
|                                                                                                                     | sgAOD-7   | AAAGGTTTGACTCGTGGAGC <b>GGG</b>  |
|                                                                                                                     | sgAOD-8   | GTCAATTTGTTCCGGGCATGT <b>TGG</b> |
|                                                                                                                     | sgAOD-9   | GTGTTTTGATCGGGTGTCT <b>GGG</b>   |
|                                                                                                                     | sgAOD-10  | TGCCCCAACAATTGACACT <b>TGG</b>   |
|                                                                                                                     | sgAOD-11  | TGTGATTGTTGGCCGATGCC <b>TGG</b>  |
|                                                                                                                     | sgAOD-12  | ATACTGTTGGCACTAGTGGC <b>AGG</b>  |
|                                                                                                                     | sgAOD-13  | GCCACTAGTGCCAACAGTAT <b>TGG</b>  |
|                                                                                                                     | sgAOD-14  | TCGTTGGCGTGCTGATCCCT <b>GGG</b>  |
|                                                                                                                     | sgAOD-15  | AAGAACTGTGGTGTCTCGT <b>TGG</b>   |
|                                                                                                                     | sgAOD-16  | CTGGCGAGGCAGCGTATACAT <b>TGG</b> |
|                                                                                                                     | sgAOD-17  | CATGTATACGCTGCCTCGCC <b>AGG</b>  |
| <b>BCL6</b>                                                                                                         | sgRNA     | CAGTCAAGATGTCTCGACTC <b>CGG</b>  |
| <b>Supplementary Table 1</b>                                                                                        |           |                                  |
| <b>LSD1 targeted CRISPR sgRNA guides</b>                                                                            |           |                                  |
| The highest scoring <i>LSD1</i> targeting sgRNAs cloned into lentiviral construct pLKO5.sgRNA.EFS.GFP (see Fig. 5). |           |                                  |

| <b>Genotyping</b>                                                               | <b>F</b>                | <b>R</b>                  |
|---------------------------------------------------------------------------------|-------------------------|---------------------------|
| B6.129-Kdm1aTm1.1Sho/J                                                          | GCTGGATTGAGTTGGTTGTG    | CTGCTCCTGAAAGACCTGCT      |
| Wild type                                                                       | TGTTGGGACAAACGAGCAATC   | GTCATGGCAATGCCAAGGTCGCTAG |
| Cre allele                                                                      | GGTGGCTGGACCAATGTAAATA  | GTCATGGCAATGCCAAGGTCGCTAG |
| <b>qPCR</b>                                                                     | <b>F</b>                | <b>R</b>                  |
| Kdm1a_int-ex5                                                                   | AATGTCACCAGCACCACAAA    | CTTCGGCATCTACAAGAGGA      |
| Kdm1a_intr1                                                                     | GTGCCATTGAGCCATATCCT    | GATCTGATGCCCTCTTCTGG      |
| qPCR_hHPRT                                                                      | TGACACTGGCAAAACAATGCA   | GGTCCTTTTCACCAGCAAGCT     |
| qPCR_hBCL6                                                                      | GACTCTGAAGAGCCACCTGC    | CTGGCTTTTGTGACGGAAT       |
| qPCR_hLSD1                                                                      | GTGCAGTACCTCAGCCCAAAG   | CCGAGCCCAGGGATCAG         |
| qPCR_hAICDA                                                                     | AAAATGTCCGCTGGGCTAAG    | GGTCCCAGTCCGAGATGTAG      |
| qPCR_hIRF4                                                                      | AGAAGAGCATCTTCCGCATC    | CCTTTAAACAGTGCCCAAGC      |
| qPCR_hEBI3                                                                      | GTCCTTCATTGCCACGTACA    | AACAGCTGGACATCCGTGA       |
| qPCR_hGPR132                                                                    | ACACGTTGTTGCAGGTCTTG    | GAATGTGAATGTGCCAATG       |
| qPCR_hARID5B                                                                    | CAGGATGCAGCAGAGGTGAG    | TGGGTCTACTCTGGATGCCA      |
| qPCR_hCCR6                                                                      | TGTGACGGCTGCAAATTTGG    | GCAGGAAAGCCAGGACTTCT      |
| qPCR_hCDHR3                                                                     | ACACTATCTTTGATGGAGAAGCC | CTGGTGGCTGGACTCTTTCC      |
| qPCR_hGFI1                                                                      | GGGTGATGAGGTTGGAGCTC    | GGCAAGAGGTTCCACCAGAA      |
| qPCR_hSMAD1                                                                     | TGCTCAGTTATTGGCACAGTCT  | ATCCTGGCGGTGGTATTCTG      |
| <b>qChIP primers</b>                                                            | <b>F</b>                | <b>R</b>                  |
| ChIP_hARID5B                                                                    | GCTCCATGCTGAAACTTGCC    | AAGATCGCACCCTGCACTC       |
| ChIP_hCCR6                                                                      | GGCAGCCTGAGAAAGAGGAA    | TGAATGTGCACCTGAGGGTC      |
| ChIP_hCDHR3                                                                     | CCTCAACCATCTGTGTGGCT    | GCAGAGAGGGGTTGTGAAGG      |
| ChIP_hEBI3                                                                      | CAAAGCCCAAGTCCTTCCTA    | AGAGTGAGCAAGGGGGAGA       |
| ChIP_hGFI1                                                                      | CGCTTACCAGGTGGCACTT     | GGGACAGGTTTTACCGCTGA      |
| ChIP_hGPR132                                                                    | CTACTAGCGGGAAAGCGAAA    | CAGGCAAAGTGTTGACGAAA      |
| ChIP_hSMAD1                                                                     | TCAGACTCTGGAGATGGGGA    | TCGACTTGATGACTTGCCT       |
| ChIP_hCDKN1A-5Kb(NEG)                                                           | GCAAGTTGGTCAGGGACACT    | GCAGTGAGGAAATGCTGTGA      |
| ChIP_hBCL6_intr9(NEG)                                                           | AACCTGCAAAACATGGTTATTT  | AATTTGCCCAAACAGCAAGT      |
| <b>Supplementary Table 2</b>                                                    |                         |                           |
| <b>Primer sequences used in this study</b>                                      |                         |                           |
| Forward (F) and reverse (R) primers used for genotyping, qPCR and qChIP assays. |                         |                           |
